# Supplementary material for: Epidemiology of Pulmonary Fibrosis: A Cohort Study Using Healthcare Data in Sweden
Source: Springer Nature journal article supplement (doi:10.1007/s41030-019-0087-9), 2019-03-05

**Epidemiology of pulmonary fibrosis - a cohort study using health care data in Sweden**

**Electronic Supplementary Material**

**Table S1:** Comorbidities/symptoms occurring in pulmonary fibrosis/IPF patients during the pre-index period as well as throughout the study period

|  | **Cohort 1** | | **Cohort 2** | |
| --- | --- | --- | --- | --- |
|  | **Pre-index (N=17,247)** | **Ever (N=17,247)** | **Pre-index (N=1,755)** | **Ever (N=1,755)** |
| **Reflux related disorders** | 2,001 (11.6%) | 3,056 (17.7%) | 287 (16.4%) | 419 (23.9%) |
|  |  |  |  |  |
| **COPD** | 1,433 (8.3%) | 2,846 (16.5%) | 202 (11.5%) | 434 (24.7%) |
|  |  |  |  |  |
| **Emphysema** | 202 (1.2%) | 563 (3.3%) | 60 (3.4%) | 175 (10.0%) |
|  |  |  |  |  |
| **Bacterial pneumonia** | 1,304 (7.6%) | 2,955 (17.1%) | 125 (7.1%) | 317 (18.1%) |
|  |  |  |  |  |
| **Other respiratory tract infections** | 3,509 (20.3%) | 6,962 (40.4%) | 418 (23.8%) | 836 (47.6%) |
|  |  |  |  |  |
| **Diabetes type II** | 900 (5.2%) | 1,457 (8.4%) | 192 (10.9%) | 340 (19.4%) |
|  |  |  |  |  |
| **Congestive heart failure** | 2,094 (12.1%) | 3,894 (22.6%) | 254 (14.5%) | 560 (31.9%) |
|  |  |  |  |  |
| **Ischemic heart disease** | 2,987 (17.3%) | 4,340 (25.2%) | 344 (19.6%) | 475 (27.1%) |
|  |  |  |  |  |
| **Myocardial infarction** | 1,381 (8.0%) | 2,408 (14.0%) | 137 (7.8%) | 223 (12.7%) |
|  |  |  |  |  |
| **Angina** | 1,977 (11.5%) | 2,541 (14.7%) | 251 (14.3%) | 311 (17.7%) |
|  |  |  |  |  |
| **Cerebrovascular disease** | 1,657 (9.6%) | 2,655 (15.4%) | 189 (10.8%) | 290 (16.5%) |
|  |  |  |  |  |
| **Atrial fibrillation** | 1,847 (10.7%) | 2,695 (15.6%) | 228 (13.0%) | 376 (21.4%) |
|  |  |  |  |  |
| **Cough** | 638 (3.7%) | 936 (5.4%) | 303 (17.3%) | 441 (25.1%) |
|  |  |  |  |  |
| **Dyspnoea** | 2,109 (12.2%) | 3,911 (22.7%) | 386 (22.0%) | 669 (38.1%) |
|  |  |  |  |  |
| **Fatigue** | 267 (1.5%) | 678 (3.9%) | 134 (7.6%) | 240 (13.7%) |
|  |  |  |  |  |
| **Musculoskeletal pain** | 1,586 (9.2%) | 2,485 (14.4%) | 423 (24.1%) | 614 (35.0%) |

**Figure S1:** Age-specific (A) incidence and (B) prevalence of pulmonary fibrosis in Sweden


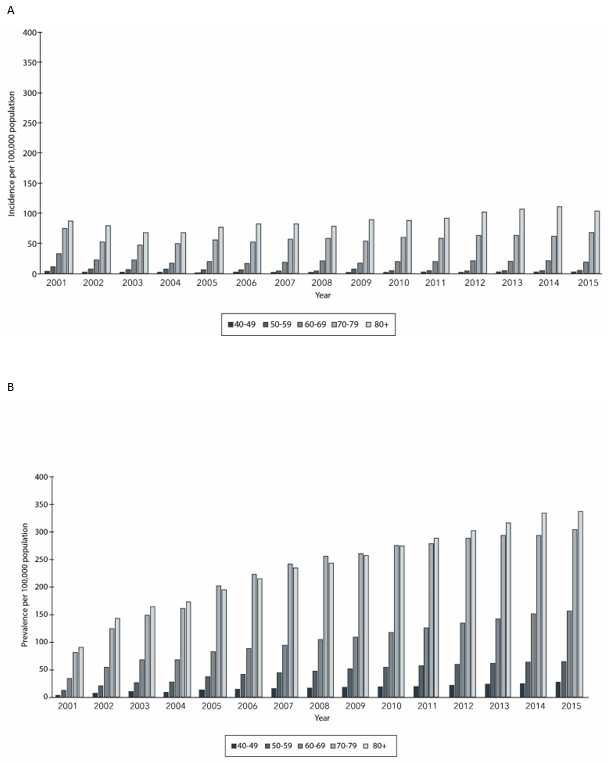


**Figure S2:** Gender-specific (A) incidence and (B) prevalence of pulmonary fibrosis in Sweden


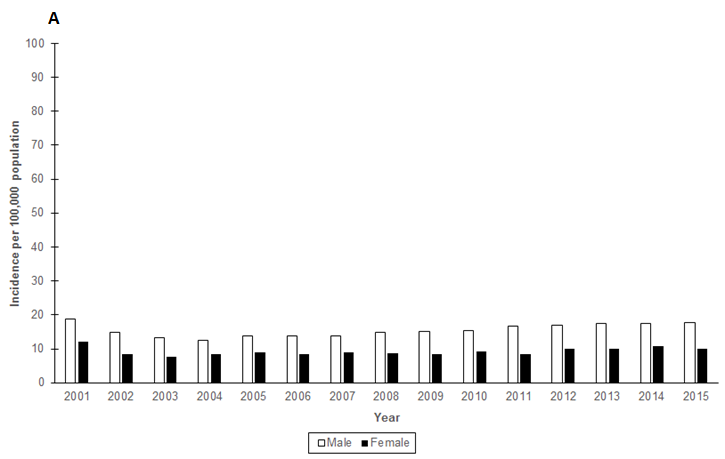


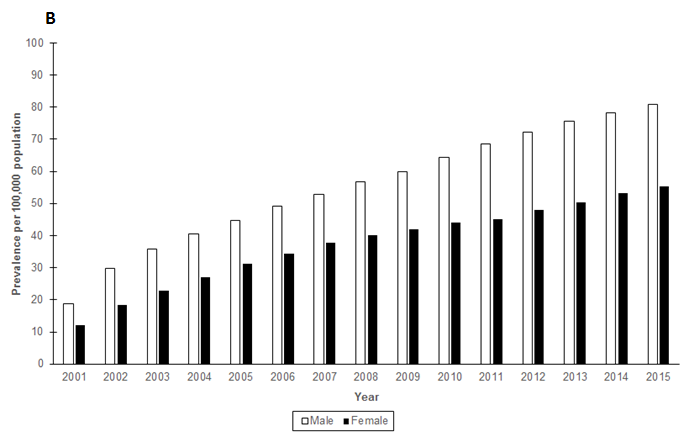

Supplement: MOESM1 [file 24441262]
